# Supplementary material for: Normoxic re-oxygenation ameliorates end-organ injury after cardiopulmonary bypass
Source: Springer Nature journal article supplement (doi:10.1186/s13019-020-01173-4), 2020-06-10
Supplement: MOESM1 [file 18070378]

## Appendix

The RT-PCR primer sequence for rabbit:

- 1) NOX-2 (gp-91-phox) (forward: 5'-GCTTGTGGCTGTGATAAGCA-3'; reverse: 5'-ACGGCACAGCCAGTAGAAGT-3'), [NM\\_001082100.1](#)
- 2) NOX-4 (forward: 5'-TTGGCTTTGGATTCTGGAC-3'; reverse: 5'-TACTGGCCAGGTCTTGCTTT-3'), [XM\\_002708641.3](#)
- 3) eNOS (forward: 5'-GCATCACCAGGAAGAAGACCTT-3'; reverse: 5'-TGTGGCCTTCACTCTCTTTGC-3'), [NM\\_001082733.1](#)
- 4) COX-2 (forward: 5'-CACGCAGGTGGAGATGATCTAC-3'; reverse: 5'-ACTTCCTGGCCCACAGCAAAC-3'), [U97696.1](#)
- 5) IL-1 $\beta$  (forward: 5'-GCCGATGGTCCCAATTACAT-3'; reverse: 5'-ACAAGACCTGCCGGAAGCT-3'), [NM\\_001082201.1](#)
- 6) IL-6 (forward: 5'-GAAAACACCAGGGTCAGCAT-3'; reverse: 5'-CAGCCACTGGTTTTTCTGCT-3'), [NM\\_001082064.2](#)
- 7) caspase-3 (forward: 5'-CACGGTGAAGGAGTC-3'; reverse: 5'-GCAAGCCTG AATAATGAA-3'), [NM\\_001082117.1](#)
- 8) Bcl-2 (forward: 5'-TGTGGCCTTCTTTGAGTTCG-3'; reverse: 5'-ATCCCAGCCTCCATTATCCT-3'), [XM\\_008261439.2](#)
- 9) Bax (forward: 5'-CCTTTTGCTTCAGGGTTTCA-3'; reverse: 5'-ATCCTCTGTAGCTCCATGTT-3'), [XM\\_008252361.2](#)
- 10) GAPDH (forward: 5'-AGGTCATCCACGACCACTTC-3'; reverse: 5'-GTGAGTTTCCCGTTCAGCTC-3'). [NM\\_001082253.1](#)

### **Oryctolagus cuniculus cytochrome b-245 beta polypeptide (CYBB), mRNA**

NCBI Reference Sequence: [NM\\_001082100.1](#)

[GenBank Graphics](#)

>NM\_001082100.1 *Oryctolagus cuniculus* cytochrome b-245 beta polypeptide (CYBB), mRNA

```
AAGCAGCACAGTATAGAAGTGCAGACACAACACGGTGCACCTCTGCCACCATGGGGAAGTGGGTTGAGAA
TGAAGGACTCTCCATCTTCGTTATTTTCGTTTGGCTGGGGCTGAACGTCTTCTCTTTGTGTGGTACTAC
TGGGTTTATGCTTTTGGAAAGAAGTATTATTATACTACAAAACCTTCTTGGGGCAGCACTGCCATTGGCCA
GGGCCCCAGCAGCCTGCCTGAACTTCAACTGCCTGCTGATCCTGCTTCCAGTCTGTTCGAAATCTGCTCTC
TTTTCTCAGGGGTTCCAGTGCCTGCTGCTCAACAAGAATTCGAAGACAACCTGGACAGAAATCTCACTTTT
CATAAAATGGTGGCGTGGATGATTGCACTTCATTCTGCGATTACACAATTGCACATCTATTCAATGTGG
AGTGGTGTGTGAATGCCCGAGTCAACAATTCTGATAGTTACTCGATAGCACTCTCTGAAATTGGGGACAA
AAAGAATGAACTTACCTCAATTTTGTTCGAGAGAGAATCAAGAACCCTGAAGGAGGCCTGTTAGTGGCT
GTAACGCGGTTGGCAGGCGTCACTGGAATTATCATCACACTGTGCCTCATACTTATCATCACATCCTCCA
CCAAAATCATCCGGAGGTCTTACTTTGAAGTGTTTTGGTACACACACCATCTCTTCGTCATATTCTTCAT
TGGTCTTGCCATCCATGGAGCTGAACGAATTGTACGTGGGCAAACCTGAGGAGAGTCTGAAGAAACATGAT
CCAGTGATGTGTGAGCAACATATCTCAGATTGGGGAAAGATAAAGGACTGCCCTGTCCAGAATTCTCTG
GAAACCCTCCTATGACCTGGAAATGGATAGTGGGTCCCATGTTTCTATATCTCTGTGAGAGGTTGGTCCG
```

GTTTTGGCGATCTCAGCAGAAGGTGGTCATCACCAAGGTGGTCACTCACCCCTTTCAAAACCATTGAACTA  
CAAATGAAGAAGAAAGGATTCAAGATGGAGGTGGGACAATATATTTTTGTCAAGTGCCCCACGGTGTCCA  
AGCTGGAATGGCACCCTTTCACACTGACCTCTGCCCCTGAAGAAGACTTCTTTAGCATCCATATCCGCAT  
CGTGGGGGACTGGACAGAGGGGCTGTTCAATGCTTGTGGCTGTGATAAGCAGGAGTTTTCAAGATGCATGG  
AAACTACCTAAGATAGCAGTTGATGGGCCCTTTGGCACAGCAAGTGAAGATGTGTTTCAGCTATGAGGTGG  
TGATGTTAGTGGGAGCAGGAATTGGGGTCACGCCCTTTGCATCCATCCTCAAGTCAGTCTGGTACAAATA  
TTGTGACAATGCCACGAATCTGAGGCTCAAAAAGATCTACTTCTACTGGCTGTGCCGTGACACACATGCC  
TTTGAGTGGTTTTGCAGACTTGCTGCAGCTGCTGGAGACACAGATGCAGGAGAGGAACAATGCTGGCTTCC  
TCAGCTACAACATCTATCTCACCGGCTGGGATGAGTCCCAGGCCAATCACTTTGCTGTGCACCATGATGA  
GGAGAAAGATGTGATCACAGGTCTGAAACAAAAGACACTGTATGGACGACCCAACCTGGGATAATGAGTTC  
AAGACAATTGCAAGTCAACACCCTAATACCAGAATAGGAGTTTTCTCTGTGGACCTGAAGCCTTGGCTG  
AAACCCTCAGTAAACAGAGCATCTCCAACCTCTGAGTCTGGCCCTCGGGGAGTGCACCTTCATTTTTCAACAA  
GGAAAACCTTCTGATTTCATCCACTACGAGGAAAGAAATTTGGGTTATGCTGCAAAGTGCCCAAATAACTC  
TGGTTAATAATATAAGATCCTCTCTCTTTAAAAAAA

## **PREDICTED: *Oryctolagus cuniculus* NADPH oxidase 4 (NOX4), mRNA**

NCBI Reference Sequence: XM\_002708641.3

[GenBank Graphics](#)

>XM\_002708641.3 PREDICTED: *Oryctolagus cuniculus* NADPH oxidase 4 (NOX4), mRNA

CGGGAATCAATCAGTCCATAAGAAGTAGTTGTGTGCGTGACGAACTGAGGGGTGGGGTGGGGCGGGGGTCC  
CCATTCTCAGCAGCTCTGCGTGTCCGGCTGCACACCTCTGCGGGTGGTGTGGAGCAGGGCAGGCCGGGGCT  
AGACTGCGGGGACGCCTCCGAGTTCCTTACCCGGGACATCCTGAGCGGGCGGCAGCCACAACAACGGGCTC  
GCCCCAGACAAAGGGCCGGCGCGGGCGGAACACTGCACAGCCGGGCAGCAGCCGCGGGGCGCGCTGCG  
GGCGCCAGGTGCGGGCCGACAGCCGGCCAGGGCAGACGCGGGCGGGTTCGAGCCGGGTGCGGGAGCCCGCC  
CGGGCTGGCTCGGTGCCGCGCCTCGGAACCTCCACTCAGTCTTTGACCCCGGGTCCCCCGCCGCCCGCC  
CCCCGCAGGCCGCGGCACTGTAACCGCTGCCTGCGCCGCGCGCTCCTTTTTCGGTGTGCAGGCGTGGA  
GCGCAGCACCGGGGCCGACGGCATGGATGTGTCTGGAGAAGCTGGCTGGCCAACGAAGGGGTAAACAC  
CTCTGCCTGCTCATCTGGCTTTCCCTGAATGGTCTGCTTTTCTGAAAACCTTCTGCTGTATAACCAAG  
GGCCAGAGTACCATTACCTCCACCAGATGTTAGGCCTAGGATTGTGTCTAAGCAGAGCCTCCGCATCTGT  
TCTTAACCTCAATTGCAGCCTCATCTTTTACCCATGTGCCGAACACTCCTGGCTTACCTTCGGGGATCC  
CAGAAGGTCCCAAGCAGGAGAACAAGAAGAGTGTTGGATAAGAGCAGAACATTCCATATAACTTGTGGTG  
TCACTATCTGTATTTTTCTCAGGTGTGCATGTGGCTGCCATCTGGTGAATGCCCTCAACTTCTCAGTGAA  
CTACAATGAGGATTTTTATTGAACTGAATGCAGCAAGATACCGAGATGAGGATCCTAGAAAGCTTCTCTTC  
ACAACTGTTTCTGGCCTGACAGGAGTCTGCATGGTAATGGTGTCTATTCTCATGGTTACAGCTTCTACTT  
ATGCAATAAGAGTTTCTAACTATGACATCTTCTGGTATACTCATAACCTCTTCTTTGTCTTCTACATGCT  
GCTGATGTTGCATGTGTGAGGGGGCTGCTGAAGTATCAAACATAATTTAGATACCCACCTCCTGGCTGC  
ATCAGTCTTAACCAAACCTCACCATCAAGACATTTCTTGGCATTGCATCACTCAGAACATTTGCCTGGAT  
CTTTCTTGGGAGAATTTTTCAAACCAAGAACTTGCTCAGAACACATTCATGAAGATTTGTGTGGAAGA  
GCCCAGATTCCGAGCTACTTTTTCCACAGACTTGGCTTTGGATTTCTGGACCTTTGTGCCTATACTGTGCC  
GAAAGACTTTATAGGTGTATTTCGGAGCAATAAACAGTCAACATCCTCTCAGTTATAAGTCATCCCTCAG  
ATGTCATGGAAATCCGAATGGTCAAAGAAAATTTTAAAGCAAGACCTGGCCAGTATGTTATTCTGCATTG

TCCCAGTGTGTCTGCATTAGAAAACCATCCCTTTACCCCTCACAATGTGTCTACAGAAAAAAGCAACA  
TTTGGAGTCCATCTTAAAATAGTAGGAGACTGGACAGAACGATTCCGAGATTTACTGCTGCCTCCATCTA  
GTCAAGACTCTGAGATTCTGCCGTTTCATTCAAAC TAGAAATTACCCAAAGCTATACATAGATGGTCCATT  
TGGAAGTCCATTTGAGGAGTCACTGAACTATGAGGTGAGCCTGTGCGTGGCTGGAGGCATTGGAGTGACT  
CCTTTTGCATCGATACTCAACACCCTGCTGGATGACTGGAAGCCGTACAACTTAGAAGACTGTATTTTA  
TTTGGGTGTGCAGAGACATCCAATCCTTCTGTTGGTTTTGCAGACTTACTCTGCATGTTATATAACAAGTT  
TTGGCAAGAGAACAGACCTGACTATGTCAACATCCAGCTGTACCTCAGTCAAACAGATGGGATTTCAGAAG  
ATAATTGGAGAAAAATACCATGCATTGAATTCAAGACTTTTTATTGGGCGTCCTCAGTGGAAACTTCTAT  
TTGATGAAATAGCAAAATATAACAGAGGGAAAAACAGTTGGTGTCTTCTGCTGCGGACCCAATTCACTTTC  
CAAGATTCTTCATAAACTGAGTAACCAAAGCAACTCATATGGGACAAGATTTGAATACAATAAAGAATCT  
TTCAGCTGAAAATCTGAGAAGAACCAGGACTCTAAAGAAGGAATGTGTGCAATATCTAAAAC TTTGAAAC  
TCAGCTGAATCAAACAGCTTTGCTGTGCCAAAGAGTAGCAAGTTTTATTATTTATGATTATTTAAAATG  
GAAATGACAGAGAATGTGGCAAGATGACAAGCCACATGCATGTTTGATCTGGAAACCAGAGAGGCCCTGA  
GGATATTTGATGTGATGATTCACTTTTCATTGCTCAAATTA AAAAGAAAAC TATTAGATGCTCACTGTTGA  
TTCTTATAGCAGTGTCAAGAACTCCCTAGTGAGGAGCTGAACTCCGTCACTCTGAGGCTGACAGTCATGG  
TCCTCTTTAAATTGTTTATGGTTGAACAAATGAAAGAAGAAAATTA AAAATTCATTGAAACTCAGATTAT  
GTTTTCTACATTGTGTATAAACACAATAGCTTTAATTTGGAAAATTTCCAGGCATATATATTAGATGTCT  
TAAAATACAGCACGAGACTCTGTATTGATACGGGTACTTTGTGTTTAATCTTCCTCACTACTGATAATAC  
CTCTGCTTGTGTCTGTAGGCTATATGTAGTATCTACTTTTTATATTTTTCTCTCTTCCTTTTATTCTAAC  
AAGGAAAGTCTCTCCTTTCTAGCCTACATTAGACTCAATAATGTAATAGTTTCATTTTCATCTTCAACTT  
ATTTAATATATGATTATTGCATAATATGAAAATATAATTACTATAATTGTAAAGGGACATGTATCCTAGT  
AACATTTTTTTCTTTAGCATTGTGGTCTCTATTTTTTTTTCCACTTTTATTCCTAGGCACACTTTATCTTT  
TATTATTTTATTTTATTTTGCCTTTTTAAAGTGCATTCTTTAATTTGTGCTTTGTGACTGAAGGACATCAT  
ACCTGCCAGCAGGCACTGAGAAACAGTATCTCTATCCCTTATCACACAATGCTTTGTGATGGAGATTTTA  
AAAGTGTAGTCACATTCCTGAATATGAACCCTGTATTTTACTTTCTCCATAAAAGGAAATCCATCATCAG  
TCATTCAAATTTATTTTTT CAGAATCAGTGTTATTGTCTCACTGTTTGATATCCAACATTCTAAGAGAATT  
GTTGGGTTTTAAAGTTGCTGTAGGGACTACACTGTGTGACCCTATCAGTTTGTTCCTGACTTTTTATATTT  
GCTACCTTAATAATTAAGGAGTTCATATAGCTTAAAGATTTTGTTTAGTGGATATTTATCAAATGCTATG  
AAATATAACACACTCTGATTTAAGCAGTTTGATTTGCCTCTGTTAAAATTTTTTGCATACAACATAACATG  
ATGGATGCTACTGTGAGTTTTTTTTTTTTGTTAGGATTCACCAATAGCAGTCAAGCATGCTAAACCACCCA  
ACGCTGAATGACTGTGAGTATATTTACATGTACACATATCTTCCTTCCCTTCTAATTTCTTCCTTTCCCT  
TCTGTAGAAAGGAGGTGAATCAGAAAAAATGATGGGAAATGTGCAATGCAACTGCAGATTGAGCTCTGAG  
GGCATAGTTAATAACCAGTGCATCTTGGCTACACTTCTTAGAGTAAAAATAATTTTATGAAAAACCTGTA  
ACAGAAAGA ACTAATAAAAAAAGTTTTGAATTTGTT CAGGCTTAATGTGCAATACTGACTCTTTAATGATA  
ACTTATATATGTGATTATATTAATGCACCTAATTTCAATAAAACAGATCCTTCCATCAGTTTTTTCA

## Oryctolagus cuniculus nitric oxide synthase 3 (NOS3), mRNA

NCBI Reference Sequence: NM\_001082733.1

[GenBank Graphics](#)

>NM\_001082733.1 Oryctolagus cuniculus nitric oxide synthase 3 (NOS3), mRNA  
ATGGGCAACTTGAAGAGTGTGGGCCAGGAGCCCGGGCCACCCTGTGGCCTGGGGCTGGGGCTGGGCCTCG

GGCTGTGCGGCAAGCAGGGCCCAGCCTCCCCAGCACCAGAGCCCAGCCGGGCGCCCGCATCCCCACCCCC  
AACCCCTCCAGCGCCAGACCACAGCCCCAAACCTAGCTCCAACAGTCCTCCGCTAACTCGGCCCCCGGAG  
GGGCCGAAGTTCCCTCGAGTGAAGAACTGGGAGGTGGGCAGCATCACCTACGACACCCTCAGTGCCAGG  
CACAGCAGGACGGGCCTTGCACCCAAAGACGCTGCCTGGGCTCCCTTGTGTTTTCCCGGAAACTGCAGAG  
CCGGCCACCCAGGGCGCTCCACCCCTGAACAGCTGCTGGTTTCCAGGCCAGGGACTTCATCAACCAGTAC  
TACAGCTCCATCAAGAGGAGCGGCTCCCAGGCCCATGAGCAACGGCTTCAGGAAGTGGAGGCCGAGGTGG  
CAGCCACAGGCACCTACCAGCTTCGGGAAAATGAACTGGTCTTTGGGGCCAAGCAGGCCTGGCGCAACGC  
TCCCCGCTGTGTGGGCCGGATCCAGTGGGGGAAGCTGCAGGTCTTCGATGCCCGGGACTGCAGGTCTGCA  
CAGGAAATGTTTACCTACATCTGCAACCACATCAAGTATGCCACCAACCGGGCAACCTTCGTTTCCAGCCA  
TCACAGTGTTCACCCAGCGCGGCCCGGGCCGCGGAGACTTCCGGATCTGGAACAGCCAGCTGGTGGCGTA  
TGCGGGCTACAGACAGCAGGACGGCTCTGTGCGGGGGGACCCAGCCAACGTGGAGATCACCGAGCTCTGC  
ATCCAGCACGGCTGGACCCAGGAAACGGGCGCTTCGATGTGCTGCCCTGCTGCTTCCAGGTCCCGGACG  
AGCCCCAGAACTCTTCACTCTGCCCCCTGAGTTGGTCTTGGAGGTGTCCCTGGAGCACCCACGCTGGA  
GTGGTTTCGCGGCCCTGGGTCTTCGCTGGTATGCCCTCCCGCAGTGTCCAACATGCTGCTGGAAATCGGG  
GGGCTAGAGTTCCCTGCAGCCCCTTTCAGCGGCTGGTACATGAGCACGGAGATCGGCACACGGAACCTGT  
GTGACCCTCACCGCTACAACATCTGGAGGATGTGGCCGTCTGCATGGACTTGGATAACCCGGACAACGTC  
GTCCCTGTGGAAAGACAAGGCGGCGGTGGAGATTAACCTGGCTGTGCTGCACAGTTACCAGCTCGCCAAA  
GTGACCATTGTGGATCACACGCTGCCACAGCGTCTTCATGAAGCACCTGGAGAATGAGCAGAAGGCCA  
GAGGGGGCTGCCCTGCTGACTGGGCCTGGATCGTGCCCCCATCTCGGGCAGCCTCACTCCTGTCTTCCA  
TCAAGAGATGGTCAACTATTTTCTGTCCCCTGCCTTCCGCTACCAGCCAGACCCCTGGAAGGGGAGTGGA  
GCCAAGGGCACTGGCATCACAGGAAGAAGACCTTTAAGGAAGTGGCCAATGCAGTGAAGATCTCTGCCT  
CACTCATGGGCACAGTGATGGCAAAGAGAGTGAAGGCCACAATCCTGTACGGCTCCGAGACTGGCCGGGC  
CCAGAGCTACGCGCAGCAGCTGGGGAGGCTCTTCCGGAAGGCGTTTCGACCCCGGGTTCTGTGCATGGAC  
GAGTATGATGTGGTGTCCCTCGAACACGAGACGCTGGTGTGGTGGTGACCAGCACATTTGGGAATGGAG  
ATCCACCAGAGAACGGAGAGAGTTTTGCAGCAGCCCTGATGGAGATGTCCGGCCCTACAACAGCTCTCC  
GCGGCCAGAGCAGCACAAGAGTTACAAAATCCGCTTCAACAGCGTCTCCTGCTCAGACCCGCTGGTGTCT  
TCTTGGCGGCGGAAGAGGAAGGAGTCCAGTAACACAGACAGTGCAGGGGCTCTAGGCACCCTCAGGTTCT  
GTGTGTTCCGGCTGGGCTCCCGGGCATAACCCCACTTCTGTGCCTTTGCTCGTGCGGTGGACACGCGGCT  
GGAAGAGCTGGGCGGGGAGCGGCTGCTGCAGCTGGGCCAGGGCGATGAGCTATGCGGCCAGGAGGAGGCC  
TTCCGCGGCTGGGCCAGGCTGCCTTCCAGGCCTCCTGTGAGACTTTCTGCGTGGGAGAGGATGCCAAGG  
CTGCTGCCCGGGACATATTTAGCCCCAAACGGAGCTGGAAGCGCCAGAGGTACCGGCTGAGTACCCAGAC  
CGAGGGCCTACAGTTGCTGCCAGGTCTGATCCACGTGCACAGGCGGAAGATGTTCCAGGCCACAATCCTC  
TCAGTAGAAAACCTGCAAAGCAGCAAATCCACCCGGGCCACAATCCTGGTGCCTTGGATACTGGTGGCC  
AGGAAGGGCTACAGTACCAGCCAGGGGACCACATAGGAGTCTGCCACCCAACCGGCCTGGCCTCGTGGA  
GGCGCTGCTGAGCCGTGTGGAGGACCCGCCGCCACCCACGGAGCCTGTGGCAGTGGAGCAGCTGGAGAAA  
GGCAGCCCTGGTGGCCCTCCCCCAGCTGGGTGCGGGACCCCGGCTGCCCCCGTCTCGCTGCGCCAGG  
CTCTCACCTTCTTCCCTGGACATCACCTCTCCATCCAGTCTCGACTCCTTCGACTGCTCAGCACCTTGGC  
TGAAGAGCCCAGCGAACAGCAGGAGTTGGAGGCCCTCAGCCAGGACCCCGGCGCTACGAGGAGTGAAG  
TGGTTCCGCTGCCCCACGCTGCTGGAGGTGCTGGAGCAATTCGCTCCGTGGCACTGCCTGCTCCCCTGC  
TCCTCACCCAGCTGCCCTGCTGCAGCCCCGTTACTACTCAGTCAGCTCGGCACCCAGCATCTACCCAGG  
AGAGATCCACCTGACTGTGCTGTGCTGGCCTACAGGACCCAGGATGGGCTGGGCCCCCTGCACTATGGA

GTCTGCTCCACGTGGCTGAGCCAACTCAAGGCTGGAGACCCCGTGCCCTGCTTCATCAGGGGGGCTCCCT  
CCTTCCGGCTGCCACCTGATCCCAGCTTGCCCTGCATCCTGGTGGGCCCCGGCACCCGGCATCGCCCCCTT  
CCGGGGTTTCTGGCAGCAGCGCCTGCATGACATTGAGAGCAAAGGGCTGCAGCCCGCGCCCCTGACTCTG  
GTGTTTCGGCTGCCGATGCTCCCAGCTGGATCACCTGTACCGCGACGAGGTGCAGGACGCCAGCAGCGCG  
GAGTGTTTTGGCTGCGTCTCACC GCCTTCTCCAGGGAACCCGACAGCCCCAAGACCTACGTGCAGGACAT  
CCTGAGGACCGAGCTGGCGTCTGAGGTGCACCGCGTGTGTGCCTCGAACCGGGCCACATGTATGTCTGC  
GGAGATGTCACCATGGCAACCAGCGTCTGCAGACGGTGCAGCGAATCCTGGCCACCGAGGGCGACATGG  
AGCTGGACGAGGCCGGTGACGTCATCGGCGTGCTGCGGGATCAGCAACGCTACCACGAGGACATTTTCGG  
GCTCACGCTGCGCACCCAGGAGGTGACAAGCCGCATACGCACCCAGAGTTTCTCCTTG CAGGAGCGGCAG  
CTGCGGGGCGCGGTGCCCTGGGCGTTCGACCTACCCGGCTCCGACACCCCCGGCCCCTGA

## **Oryctolagus cuniculus cyclooxygenase-2 (COX-2) mRNA, complete cds**

GenBank: U97696.1

[GenBank Graphics](#)

>U97696.1 Oryctolagus cuniculus cyclooxygenase-2 (COX-2) mRNA, complete cds

GCACGAGTGCACGCCAGCTCCGCCCGCCCGCCCGGACGCCCGCGCCCGCAGATGCTCGCCCGCGCCC  
TGCTGCTCTGCGCCGCGGTGGCGCTCAGCCACGCAGCAAATCCTTGCTGTTCCAACCCATGTCAAACCG  
AGGTGTGTGCATGACCATGGGATTTGACCAGTACAAGTGCGACTGCACCCGGACCCGATTCTACGGTGAA  
AACTGCTCCACGCCGAATTTCTGACCAGAATCAAACCTGCTCCTGAAACCCACTCCGGACACGGTGC ACT  
ACATCCTTACGCACTTCAAGGGAGTCTGGAACATCGTCAATAGCATTCTTTCTGCGAAATTCAATCAT  
GAAATACGTGCTGACATCCAGATCACATATGATTGACAGTCCACCAACATATAATGTGCACTACA ACTAC  
AAGAGCTGGGAAGCCTTCTCTAACCTCTCTACTACACAAGAGCCCTCCCCCTGTGGCCGATGACTGCC  
CAACGCCCATGGGTGTGAAAGGCAAGAAAGAACTTCTGACTCTAAAGACGTGGTGGAGAAACTTCTCCT  
CAGAAGAAAGTTCATCCCCGACCCCCAGGGCACCAACATGATGTTTGCATTCTTTGCCAGCACTTCACC  
CACCAGTTCTTCAAGACAGATCTTAAGCGGGGACCAGCCTTACCAAAGGACTGGGACATGGGGTGGACT  
TAAATCATATTTACGGTGAACTCTGGACAGACAGCATAAACTGCGCCTCTTCAAGGATGGAAAAATGAA  
ATATCAGGTAATTGATGGAGAGGTATATCCTCCAACAGTCAAGGA **CACGCAGGTGGAGATGATCTAC**CCG  
CCTCACATCCCTGCGCACCTGC **AGTTTGGCTGTGGGCCAGGAAGT**GTTTGGTCTGGTGCCTGGTTTGATGA  
TGTATGCCACAATCTGGCTCCGGGAACATAACAGAGTGTGCGATGTGCTCAAACAGGAGCATCCAGAATG  
GGATGATGAGCAGCTATTCCAGACAAGCAGGCTAATACTGATAGGAGAGACTATTAAGATTGTGATTGAA  
GACTATGTACAGCATTTGAGTGGCTATCACTTCAAACCTCAAGTTTGACCCAGAGCTGCTTTTCAAACCAAC  
AATTCCAGTACCAAAACCGGATTGCTGCTGAGTTTAAACACACTCTATCACTGGCATCCCCTTCTGCCTGA  
CACCTTTCAAATTGATGACCAGCAGTACA ACTATCAACAGTTTCTCTACAACA ACTCTATACTACTGGAA  
CATGGACTTACCCAGTTTGTGTAATCATTACCAGGCAAATTGCTGGCAGGGTCGCCGGTGGCAGGAACG  
TTCCGCCTGCGGTGCAGAAAGTAGCAAAGGCCTCCATTGACCAGAGCAGGCAGATGAAATACCAGTCTCT  
TAACGAGTACCGCAAACGCTTTTTGCTGAAGCCCTATGAATCGTTTCGAGGA ACTTACAGGGGAGAAGGAG  
ATGGCTGCCGAGCTGGAAGCGCTCTACGGCGACATTGATGCCGTGGA ACTGTATCCTGCCCTGCTGGTGG  
AGAGACCGCGCCCGGATGCCATCTTTGGGGAGTCCATGGTAGAAATGGGAGCACCGTTCTCCTTAAAGG  
ACTGATGGGTAATCCTATATGTTCTCCTAACTACTGGAAGCCAAGCACGTTTGGTGGAGAAGTCGGTTTC  
AAAATCGTTAAACTGCCTCGATT CAGTCCCTCATCTGCAACAATGTGAAGGGCTGTCCCTTCACTTCAT  
TCAACGTCCCAGATCCTCAGCTCACCAAAACAGTCAACATCAACGCGAGCGCCTCCCACTCCCGGCTAGA

GGACATCAATCCCACAGTCCTGCTGAAAGGCCGCTCCACTGAACTGTAGACGTCTGTTGATCGTATTTAT  
TTATTTATGAGCCAGTTCTTTTAACTTAATTATTTAATAATATTTATAGTAAACTCCTGATGTTACCTGA  
CATCTTCTGTAACAGAAGGCAGTACTCTTCTTGCAGAGAAGAGCTCATACTTGTGAAAACCTCCATGTCA  
CTACTTTAAAGACATATTTTCTTCAAGTTTTTCATTCTTTTTTATAAACCAATGGTAAATGGATTTTGACA  
TCTTTTTACTTGAATTTAAATTCCTATGATGTTAGAAGAACAAAGTCAAAGATGTCTGAATGCTTAATGT  
CACTGCAACATGGAAAACACTGCCGGTTTTCTGTACTGTGAGATCTGTGTTTTCTTCCATGATGCACTAGGA  
GCAAAGAACATCTGGATTTTAAAGAACTACAGGGCATTCTTCTTTCATCAAGTAAAAAGAGATTCAAG  
TCTGTTTTTAAAGGAATGTTTAGCTCAGACATTATCAATAATTTTCATGTCTGCTTTTTTAAAGCAGCATT  
GAAACAGTAATTTGAAATTTCTAAATTCAGTGGGTAGAATCACTTTTAAAAATTTATTTTATTTTCTGTA  
CCAAAGTTATAAACTTGTATTACATCAATAGAGGAAACTTTTCATAGATTTAAATCTCTAAAATCAGTGG  
AAATTATACTACAACTGCTGGTTAAAGGTTGCCTAAGAGACTTTGCATTTTCACTAAGAGTAAAAATC  
TAATGTGACTGTTACAACCTTCTTTCAAATAAAAAATGCCAAATGTAGTAAGGTGGTGGAGCCACTGAGGT  
CCTATCTTAAAAATATTTTTTGTAGAGAGATTCCACAATTTGTTTTTGTGCCTAGTAACAAAACCTATGAT  
AGCAATTTCTACATTTACAATCAGCAATAAAAAATAGAAGAAAACCAAACAGTATAAATTTGGGTTTAAA  
CTCTTTAAGGAGACTTTACTTTAGCCTTGTGTGTACTACAGGCCTGGTACTCAACAGACTTCACTCTGAG  
GTTTCATGAACTTCCAAGCTGGCCTCACTGATGGGCTGTTTTCTTAGACTTTCTGTTGTACAGTGTGACTT  
CGCAGTGGCCTCAGGAAATGCCTCTTCAGAATCCACTAGGCATTACTGAATCCATTCAGGCATTGCTTTC  
ACCCAAATCTTGATCAGCCAGTTCAGTTGTGCATCGGAACCAAGTCGGGCCACACACATGCTGCTCCTCT  
TACTGTTTTCTTTACAGCCTTCTGTGCTAAGAGAATCTCTTGTCTAACTGATGTATTTCTTCTGGTTTTGT  
TTTTCTGGTTTTGAAGATGAGAGTTCTTCTTTCTTTGAATTCGACCAATATTTTCTTACTTGAAATTTTGC  
AGTTTTTCAGGAAAACCTCAGCTCAGGACTACTATTTAGTTCCTCCCAAGAGGAATAAAAGAGAAAATATG  
GCGCTTAAAAAAAAAAAAAAAAAAAA

## Oryctolagus cuniculus interleukin 1 beta (IL1B), mRNA

NCBI Reference Sequence: NM\_001082201.1

[GenBank Graphics](#)

>NM\_001082201.1 Oryctolagus cuniculus interleukin 1 beta (IL1B), mRNA  
ACAGATCTCTTCGAGGCAAGAGGCACAACAGATCGCTTTGGGATTCTCTCCAGCCACTCTTCATTGTTCA  
AATCTCTAGGACAGCCATGGCAACAGTACCTGAGCTCACCAGTGAGATGATGGCTTACCACAGTGGCAAT  
GAAAATGACCTGTTCTTTGAGGCCGATGGTCCCAATTACATGAAGAGCTGCTTCCAGGACCTGGACCTCT  
GCTGTCCAGACGAGGGCATCCAGCTGCGCATCTCCTGCCAACCCCTACAACAAGAGCTTCCGGCAGGTCTT  
GTGTCAGTCGTTGTGGCTCTGGAGAAGCTGCGGCAGAAAGCAGTTCCCTGCCACAGGCCTTCCAGGATGAC  
GGCCTGAGAACTTTCTTTTCTTAATCTTTGAAGAAGAACCCGTCTCTGCAACACCTGGGATGACTACA  
GTCTTGAGTGTGATGCAGTACGATCACTGCACTGCAGGCTCCAGGATGCACAACAGAAATCCTTGGTGT  
GTCTGGCACGTATGAGCTGAAAGCTCTCCACCTCAATGCAGAGAATCTGAACCAACAAGTGGTGTCTCC  
ATGAGTTTTGTGCAAGGAGAAGAAAGTAACGACAAGATACCTGTGGCCTTGGGCCTCAGGGGGAAGAATC  
TGTACCTGTCCTGCGTGATGAAAGACGATAAACCTACCCTGCAGCTGGAGAGTGTAGACCCCAACCGTTA  
CCCAAAGAAGAAGATGAAAAACGATTTGTCTTCAACAAGATAGAAATCAAGGACAAGCTGGAATTTGAG  
TCTGCCAGTTCCCAACTGGTACATCAGCACCTCTCAGACAGAGTACATGCCCGTCTTCTGGGAAACA  
ACAGTGGCGGCCAAGACCTAATTGACTTCAGCATGGAATTCGTGTCTTCTTAAAGCAAGCCTTACAAGGA  
GGGTCCGCGGTGCTGAATGTGTTACCCCTGCGGCTGGCAGACGGGAAACAGATTGTGACACCCCACTGC

CTTCCCTTGGGAAAATTAAGGAGAGCTCTTTCCCACCAGCTGGGAGCAGCAGCTCTCTCTCCCAGGGCC  
ACTCCTCCGACCCTTGCTGAGCCAGCCTCTCTTACCTCTGCCATTTCAGGCAAGGCCAGCCTGACAGTTCA  
AAGAACCTTGGTACCCAGCTTCTATCAGCAACCACTAAATTATCTATTTATGTATTTATTGATAGGGTGG  
TCTATTTAATCCAAGGAGACCAGAGGCAGCAGCATCTTCAGTATTTATGGAATAAATTTAATCTGAACTT  
GTATGCTGTCTACATCAAGTCCTTTCACTAGGGCCAGAAGTATATAAGCTTGGGCTGAGTTATTTAAATA  
GGAATAATTATGGGTGAAGAAGTATGATCACACTGTTTTCAATGGTTCTGAAATAAACTATACTGGAAAAA  
GTC

## **Oryctolagus cuniculus interleukin 6 (IL6), mRNA**

NCBI Reference Sequence: NM\_001082064.2

[GenBank Graphics](#)

>NM\_001082064.2 Oryctolagus cuniculus interleukin 6 (IL6), mRNA  
CGAGCCCACCRGGAACGAACAGAGCTCCCTCTGGCCTCCAGGAGCCGACTATGAACTCCTTCACAAGCG  
CCCTCCGCCCAGGTCCCCTCGGCTGCTCGCTGGCGCTGCTCCTGGTGGTGGCTACCGCTTTCCCCACTTC  
AGCACCCGTGAGGGAGGACTCCAACACCAAGGCCAGCCCCGACAAAACCTCACGCCGCCAGGCAGAACC  
ATCGAGAGCATCCGGAGCATCCTGGAGACCATCAAGGAGCTGAGGAAAGAGATGTGTGACCATGATGTCA  
ACTGCATGAACAGAAAGGAGGCACTGGCGGAAGTCAATCTGCACCTTCCAAGGCTGATAGAAGAAGACGG  
ATGCTTCCCGCCGGCGGTGAATAATGAGACCTGCCTGCTGAGAATCACTTCGGGGCTGATGGAGTTCGGG  
ATGTATCTCGAGCACCTTCAGGCCAAGTTCAGGAGTGACGAA**GAAAAACACCAGGGTCAGCAT**GGTGCTGA  
AGAACATCCAACACCTGATCAAGACCCTGAGGCCAAAGGTCAAGAATTTGAATGAAGAAGCCACCCTCAA  
GCCAGCCGTTGCGGTGAGCCTGATGGAGAACCTGC**AGCAGAAAAACAGTGGCTG**AAGACGACCACGATC  
CACTTCATCCTGCGCGGCCTCACAACTTCTGGAGTTCACCCTGCGTGCCGTGGACCTGATGGAGTGGC  
GGTGTCTTGGCTTGGCGAATTTTCATGGGCTCTGCCTCCACGGTCAGAACACACCATCCTGTCCATTGGA  
CACATAACTTAACATTGTTTACGAACTAGGAAGATGAGCGTTAGGACACTATTTTAATTATTTTTTTAA  
CTTATTAGTATTTAAATGTGGGAAGCTGGGTAAATTTATATGCGATTGATATTTATAACTTATGAAATGC  
CATTTGTGATATTATAACTGTTACAGTTGTGAACGAATAGTGACAATGGGCAATTTGAGTATCCCCTGT  
TACAGAGCCAAATCTTTTCTTGAATGTGTAGGCTTACCTCAAATGAATTGCTAACTTACACTTTTCAAG  
AAATGTTTTAAAGTATATTTATATATTGTTTTAACTATTCTTATACCAATAAATTACATTTTTTTTTAAAAA  
AAAAAAAAAAAA

## **Oryctolagus cuniculus caspase 3 (CASP3), mRNA**

NCBI Reference Sequence: NM\_001082117.1

[GenBank Graphics](#)

>NM\_001082117.1 Oryctolagus cuniculus caspase 3 (CASP3), mRNA  
ATGGAGAACAACGAAACCTCCGTGGACGCAAAATCTATCAAAAATTTGGAAACACAGACCATAACATGGAA  
GCAAATCAATGGACTCTGGGAAATATCTGGACAATAGTTACAAAATGGATTATCCTGAAATGGGTTTATG  
CATAATCATTAAACAACAAGAATTTTCATAAAAACACTGGAATGTCGTCGCCGTCTGGTACAGATGTAAAT  
GCAGCAAACCTCGGGGAAACATTCATGAACTTGAATACGAAGTCAGGAATAAAAATGATCTTACACGTG  
AAGAAATCATGGAACCTCATGTACAATGTTTCTAAAGAAGATCATAGCAAAAAGGAGCAGTTTTATTTGTGT  
GATTCTAAGC**CACGGTGTGAAGGAGTC**ATTTATGGAACAAATGGACCTATTGAACTGAAGAAATTAACA

AGTTTCTTCAGAGGAGATTACTGTAGAAGTCTAACTGGAAAACCTAAACTTTTCATTATTTCAGGCTTGCC  
GAGGCACAGAGCTGGACAGTGGCATCGAGACAGACAGTGGGGTTGACTATGACATGGCATGCCAGAAAAT  
ACCGGTTGAAGCCGACTTCTGTATGCATATTCCACAGCACCTGGTTACTATTCTGGCGAAATTCGGAG  
GAGGGGTCCTGGTTCATCCAGTCCCTGTGTGCCATGCTGAAAGAGTACGCTCACAAACTTGAATTCATGC  
ACATTCTTACTCGTGTGAACCGGAAGGTAGCGACAGAGTTCGAGTCCTATTCCCTTGATGCCACTTTTCA  
TGCAAAGAAACAGATTCCATGTATTGTGTCCATGCTCACAAAAGAACTGTATTTTTATCACTAAAGAAAT  
G

**PREDICTED: *Oryctolagus cuniculus* BCL2, apoptosis regulator (BCL2), mRNA**

NCBI Reference Sequence: XM\_008261439.2

[GenBank Graphics](#)

>XM\_008261439.2 PREDICTED: *Oryctolagus cuniculus* BCL2, apoptosis regulator (BCL2), mRNA

AAAAAAAAAATAAAACCTCCCCGCTCCCCACCCTGGCCGCACCACACACGGCGCGGGCTCCTCGCGAG  
GCCGGCGCGTCTGCCTTCATTGATCCGCAGCTTTTCGGAAAACGCGTCGGCTGCTCTCGGAGTTGAATC  
AGAAGAGGACCCCGCGCCGGCCGGCCCCGTCGGCGCCCGGGCAGAGTCCGCGCCGTGCCCGCGCGGCG  
CGCGCGCCTGTCAGTGGCCGAGGGGAGCCCGGACGGAGCGCGCTCCGGGGCTCGGGGCCGATTCTCGG  
GATTGACGTTTTCTGAGGAGCAGAAACCCGGGGCCAGCCTGGAGACCCCCCGCCCCGGGGTGCCTACAC  
CCGCGCCCCGCGCCTCCCGATTTCATTGGAAGTTTCAAAGCGGCTCTCACCCGGGAGCTCCGAAGATTGA  
TGGGATCCTTGCCTTATGCGTTTTGTTTTGGTTTTGCAGAGAAGGAAACTGGACAGAGGGTCATGCTGTCC  
TTTTAAAAACACAACATCACGTAGGGAAAAGACTGGCGTTTACCACGCTTATGAATGATAACGTGCCTCGT  
GAAACAGAGATCCGAAAGGGATTTGAGTAAAAATCTCCTGCGCCTGCTGCCAACGGGGAAACACCAGAAG  
CGAGGGCTCCGCGTGAAGACACCCCGCGCCCGAGGATGCGGCGCGCGCCCGGAACCCCGCCGGC  
TTCTGAGCGGGCCCGTGCGGCGGGACGGGGCCGGAGGCACCGCGGGCGCCAAAGGGCAGCATGGCGCAC  
GCCGGGCGAACAGGGTACGACAACCGGAGATCGTGATGAAGTACATCCACTATAAGCTGTCCCAGAGGG  
GCTACGAGTGGGACGCTGGGGACGCGGGCGCCGCTCCGCGCCGGGCGTCTTCTCCTCCCAGCCCGCGCC  
CGCTGCGCCCCGGGACCCGGCCGCCAGGACCTCGCCGCGCCGCGCCGGCCGCGGGGCCCGCGCTC  
AGCCCGGTGCCACCTGTGGTCCACCTGACCCTCCGCCAGGCGGGCGACGACTTCTCCCGCGCTACCGCC  
GCGACTTTCGCGGAGATGTCCAGCCAGCTGCACCTGACGCCCTTTTACGCGAGGGGGCGCTTTGCCACGGT  
GGTGGAGGAGCTCTTCAAGGATGGGGTGAAGTGGGGGAGGATTGTGGCCTTCTTTGAGTTCCGGTGGGGTC  
ATGTGTGTGGAGAGCGTCAACCGGGAGATGTGCCCCCTGGTGGACAACATCGCCCTGTGGATGACTGAGT  
ACCTGAACCGGCACCTGCACACCTGGATCCAGGATAATGGAGGCTGGGATGCCTTCGTGGAAGTGTACGG  
CCCCAGCGTGCAGCCTCTGTGAGACTTCTCCTGGGTGTCTCTGAAGACTTTGTTGAGCCTGGCCCTGATA  
GGAGCTTGATCACCTCGGTGCCTACCTGGGCCACAAGTGAAGACACCAGGCCTGCCCCCACAGATAT  
GCAAACAGTTCACGAAAGCAGGAGACATGATATGCATTGTGAGTCCCGCACCATGCAACGCAGCTGGCTC  
TGTGAAGCGAGAGCCAGCAAGCCCCACGCGTACACAAAACAGCTTTTCAAGCAAATGTCGAATCAGCTAT  
TTACTGCCAAAGGGAAATACCATTTATTTTTTACTTTTGAAGAAAAAAGATTTATTTATTTAAGACAG  
TCCCATCAAACCTCCTGTCTTTGAAACCTTCCCACGAGTGGCCCGAGCACTCCTTGTGCGGCTGCCCC  
GGTGGCCACACCCGTGGGCGTAGATTTGCTGGCCGTGTTCTTGGCCGCACTGAGCGACCATCTGAAGAG  
CAAGAAAATGGACCCAGGGCTTGACCCCGCAAGCCAGCTCTCGGACCTGTCTAGGCTGGGAGGAAGGTG  
TCTTTCCGACCTGCATCTACCTGCCCTGGGGCCTGGGACGTCAACTGGGAAGTCTCATTTCCTTGGCCT



CAAGAACACACACTTGGCCCGTGACCCACATGGTCCAGACCCAGTTGCAGGAAAGGAAAAACAAACAAAA  
ATACCTGGGAGCTTCAGACGGACGTGGCCCCCGCTGCCCTTCCCACGCCCAAGGACGGCTGCGGGAACAA  
AATGCCCTTAAACCATAGGAAAGTATTTTTTTAAGCTACCGATTGTGCCGAGAAGCGTTTTAGCAATGTA  
TACCATGTTCATCCAGTACCTTAAGCCCGGATTGTGTATATTCGTATATTTTAGATACGCAGTGCCCGCG  
CCCAGTACTGGCTGTGTCTGAGCCGGAGACAGCATCCTCTGGAGTTCAAGGCAGGGGACGTTTTCGGTGAC  
TTCTTCAACACAGGAAGGCTGGCCAGAGCGTCAGGCTGCCACAAGTGCCTGCATTCCGGAGACGGCGTC  
TGTAGAAGCTGCCTTGTGTCCGGCTCTGGGGCCTGGCCCTGGAAGTGCCTGGGCACCCGCAGGCTCCT  
GGTGGGGATTTTTCAACAGAGCGGTGCGGTCTCGAGTGTGGAAAGCTGATGCAGCTCAGAATCCACT  
GTCAAGAAGGAGCAATAGTGGGACTTGGCCCTGGGCCTGTTGCGCTCGGGCCGGCAGGCAGGCCTGTTCT  
CTGGTAGAGCGTGGAACCTGGGGCCACAGCTCCCCTAAAGACTTCGTCACTGTGGAGGCAAGGAAAGAGG  
CCGCGTGCCTCTCCTGGCAGAGGGACGTAATGGAGACTGAGCAGCCGCCACCGAAACGGGGTGCGGCCCG  
TGGTGGCCGAGGCACAGGTGCATTGGCTGCTCGGCCGTGCGCCTGTCTGTGCAGTTTTAAAGCAAGGTTTT  
CAATGACTTTGAGTAGGGTCATGAGCCCTAAAGGAAGTGTGAAATGAGGTGTCATGGATTAATTGACCT  
GTGTCTGTGGAATTAACATGTAAAACATTATCTTGTCAATTGGAGTTGTTTTTATTTGAAAACCTGATAG  
AAGAAAAAAAAAATAGTTCCAGGTGTGGAATGTGGGGATTATCTGTACATCCTGGGGCATTAAAAAGGAA  
GAAAAAAAAACCAGTGGTGGAAAACCTGTGGAGAAGTAACAGAAAAAGTGAAGTCTCTGGCTAATAAACTAG  
CAAATACTTTGCAAGTTTGAATCAGCTTTGAGACATTCATGGAATAACTTTGTGGCATTATTGCATTA  
TATAACATTTATCTGTATTAACTTTGAATGTACTATGTTCAATGTTTGATGCTGTGGTTGATATTTGCA  
AAGCTGCTTTTTGAAAAAATACATACATCTCAGCATTTTCTGAAATAATTGTATTTAGTTATGGCCTGCA  
CACTATTTGTTAGCAAAAACGATCATTTTTCCATTGGAGATGCTTGTCTCTCGTTCCTTCAGAAGCGTTT  
CTGAAAGGACGGGTGAGCCTGAGTCTCGGCTGCCTGAGGAAGCCTGGGTTTTGCTGGCCACTGGGAGGC  
TCGGATTTACCGAGTTGCATGCAGCTCCATGTGCACAGAACTGCTCCGGGCTGTGGATGCATCCCCTTG  
TCCCTTTGCCCTCGTGCCTTGAAGGGTTCCTTGGCCCTGGGCAAGTCACCATTTTGCTCACATAATTTAG  
GATTCATGCATGTGTGGGTAAACCCGGGAGATTCAATTTGGTTGCAAACCCAGTGGGGAAGTGACCCAAG  
GATGGACATCTGGCTCTGACGGCTGCCCCCTTTAGGCGACCTGTTTTGATGCAGACCCACCCCGACCC  
CCGAAGGAGGCTTTTCTGCCGCTGCCCTTCGGGGCCTCCTGAGTGCCGTGGGGCTGCCACTTCGCAGGGA  
GGGCAAGAAACCCACGGTTTTGGAGCCAGACCTCCCTGGCGGGCCTCAGGGAATGGGACGATCAGACCTTT  
GAATGATTCTAATTTTTAAGCAAAATATTATGTTATGAAAGGTTTACATTGTCAAAGTGATGAATATGGA  
ATATCAAGTCTGTGTCTATCCTGCCAAGATCACGTTTCATGGAGTCAGTGTGCCGGACACGCCGAGGC  
GCGAGACCCTCCAAGCTGCTTCAAAGTCGCCACGAAGAACACGGACAGTTTTCATAACAGAAAGCCTGC  
TCTCATCTTTTATTGTTTTTGTATTGTTGTTCAAATTGGGATTTGCAGAGTATCTGAAAAAATGTAC  
ATATAAACAGAATGGTCCAGGGGGCTACCCTCCAGGCTGGTTTTGTCTCAATGCACCCAGCCACCTGGCG  
TGTACAGTCCCGTGGCTGTGCCACTCCACGGGGAGTCGATGTTGCAGTTTTCTTGTGTTAAAGACAT  
ACTAGAAGCAATGAATGTGTATAAAAAGCCTCAACTACTCATTTTTTTTTCTCTTTTCTTTCATTGGC  
TCAGTTAGTTGGCAACTGGGCAACAGAGAACCATCCTGAAGTGTTCGTGTTGAGAAGGGATTACATACC  
AAATCTTAACACACAGAGAGGAGTCTCCTTCTGTTGGCCAGGTCCCAGTTAAAGAGGACACCTTCACT  
TTGCAAATTTGGTCAAGGGCTTTAAAAAAGAAACCAGGAGGCAAAGAGCATCCAAGAACCTCCCTGTTT  
CTCCAAGCCTCACCATCCCAGCACTCAAAGAAAAGACCCAAACAATGTAGAGAAGAGTTCATCCCAGCT  
TTTGAGATTTAAGATTTGGATTAAGTCCCACTTAGAATTAAGGAAGCACTTTTCTGTAGTTCAAACGA  
AACCCACCATCTCTGCCCCAGCTCACTGTGTCTCTGTGCATTACGTGTGCCCTGCCATTTACATGTGA  
CTTTTATTTTATTAAGAAATGTTTGTACCTATCACCTGGAGACCTAGCCAGGCCAGTATTGGGGACA

GCAGGAAGGGATGATATATCAGAAGGGTAAGTTGTAATAATCAGGACTAAATGTAAATCATTAGGGCAGT  
CCCAACAAATGTCTAGCTTTTCACATCCCGAATCTAGGGAATGAACAGAATTGCAGTAGTCTATATTTGTA  
AAGCTATAGTAAAACAAATAATTTATAAATGTGAACTTAAACTAATTCCAATTGTCCTTTGAAGGCAATG  
GCTGTTTTTATACTTTCTTATCACTTATAGTTAGTAACATACACCTCCTCTATCAGAAAAAAAAACAGGAA  
AGACTTGAAACATAAGCTGTTCTAAGGAAATCAGGGCTTCAGTTGAAATCCTATTCTGATCTTCCTCCGT  
GGTGTCTTTTGCAGCCAGACAAATGTGGTTGCACACTTTTTAAGAAATACAATTCTACATTGTTCAGGCT  
TATGAAGGTTCCAATCAGATCTTTATTGTTACTCAATTTGGATCTTTCAGGGATTTTGCTTTTTAATTTTC  
TACAAGACAAAGGACATTTGTTGTGGGTGGGAGGGGAGAAGAATTTTTAAATGAGTAAAATATTCCCAAG  
ATTGGATCAGGGAATGGAGGTTTTTCAGAGAAGCCAGATGTATGGGGGGGGGGGGGGGTGAGGGATCTTTA  
GAAGGTCCGTGTCATTCTCCATAAAGGCCCTTATGCAACAGATGAGAAACATTTTTTTAAGTCTGTG  
GTGCTTTCAGATTTGGAGATACTGGCACACTCAAAGGCCAGCTCAGTGTGGCTGCGCAGGGGTATAAAGT  
TTAAAGCTGGGTGTGTGTAATGGGAATGTTAGCACAAAGTTTGCAGTTGGAACATAACAGGATATTTAATG  
ACAATGACAACCTTCTGTTGGTAGGAACATCTGTTTTAAAATATTTATTATGCAGGACACAGAAAACATT  
TAAATAGAATGAAGTTGAATAAAACAATGGAAAGCTAAATTGGGTCCCTTAGCCTTACCCAACGACTCAT  
TCTGTTCTGTGCCTTTGGACAACCATGACCTGGGACAACCATGAAATTGGGCACAAAGAAAACAGATGG  
AATATGGATGGTACTGCAACAGTTGCGTCAAGACGATCCCAGAAAATAACTTAAAACCAAATTCCTGTT  
GTTAATAATTTTTCTCTATGTACCAAGATCAGCACCTCTGTTAAGCACTCATGGAAGATGGAATGTTAA  
TAAATACGACCGTAGTGTGACACTCCATAATGCCATGCACCTAAATATCTTGGAAAATCTGCTCTGCGG  
CCTCCAGCTAGCTCATTTTATTAAGTTTTGCCCTCCAAGGTAGCATTTTGAAGGAGTGATGGCTGATCAAA  
TTTTCTTTGGGGAAGCTTCTTCTGGTGGTTGTGTTTGTATTTTTCTTTAAACTAATTTTTGCTTTTGT  
TTTGAGTTACTGGGTTATTTTCAATTTTAAATAAAGTAACTGTACAATATGTATTTTTGTATTGAAAGCT  
TTTGTGTCAGATTTTACACTTTTACCTTCCATGGCTGTTTCTAAGATTGATAATTTCTTAGCAGTGGC  
TCATAGCCTGAAATACTGTATACACCAAAAATGTATGGTAAGCATACTTTACATAGTTAAGGTAAAGTAA  
GTTTCCAGTTGGCCACCATTAAATATAATGGCACTTTGTGTTGTTGGGAAAAGTCACATTGCAATTAACC  
TCTCCTTGTCTGTCCAGTTAATTTCTGTAAGAAAAATAAAGTACAGTGTGAGATA

**PREDICTED: *Oryctolagus cuniculus* BCL2 associated X, apoptosis regulator (BAX), transcript variant X1, mRNA**

NCBI Reference Sequence: XM\_008252361.2

[GenBank Graphics](#)

>XM\_008252361.2 PREDICTED: *Oryctolagus cuniculus* BCL2 associated X, apoptosis regulator (BAX), transcript variant X1, mRNA

AGGGCGAGTCCCGTGGCCGGCCAGCCCCGGATCCCTCCTGCCGGCCCGGGCCGTGCGATCTCCAAGCA  
CTCCGGGCCAGGAACTCCCGGATCGGGCGCTGCCAGCCTCCAGTCCCCTCCCTCCTTGGAGGTTCCCGGC  
TCTCCGGCCTCCACGCCCCGATCCCTTCTGCCTGGCGTTCTCGGACCCCTGATAACTTGGGGATCCCGG  
AACCCCAACTCCCGGGCAGGCCCGGGCTTGTGCGGGCACCATTCTGCCTCTGACCCCGGTGGGAGGG  
GCGGTCTGCCTCGGCCCTCAGACTAGGGGTCTGGGTGCAGGAGACGCGCCCTGAGCTCCCCTCCCGG  
AAGAATGTAGGATGCGGGCCCCGCTGCCAGCCCCTGGCTCCTGCAGAGCCTCACTGCATGGACTCGCAGC  
CGCCTTGTGCACCAGGGACCCCGGAGTTCGCGGCACGGCCCTCCCTCGGGGACCACGGGCCTCCAGGAG  
TCCAGGCGCTCTTCCCTCCTCTCCTCTAGGGCCACCAGCTCTGAGCAGATCATGAAGACAGGGGCC  
CTTTTGCTTCAGGGTTTCA

CGCAGGGGCCCCAGGACGAGTCCACCAAGAAGCTGAGCGAGTGTCTCAAGCGCATTGGCGACGAACTGGA  
CAGTAACATGGAGCTACAGAGGATGATCGCTGCCGTGGACACGGACTCCCCCGCGAGGTCTTTTTCCGA  
GTGGCAGCCGACATGTTTGCCGACGGCAACTTCAACTGGGGCCGCGTTGTCGCCCTGTTTTACTTTGCCA  
CCAAGCTGGTACTCAAGGCCCTGTGCACCAAGGTGCCTGAGCTCATCAGGACTATTATGGGCTGGACGCT  
GGACTTCCTCCGAGAGCGGCTGCTGGGCTGGATCCAAGACCAGGGTGGTTGGGACGGCCTCCTCTCCTAC  
TTCGGGACCCCCACGTGGCAAACGCTGACCATCTTGGGGGCCGGAGTGCTCACCGCCTCACTCACCATCT  
GGAAGAAGATGGGCTGAGGCCGCCAGCTGCCTTTGGACTGTGCCATTTCCGCATAAATTATGACATTTTT  
CTGGAAGGCTGGGGATCCGGGGACACAGGCGTTTTTCTTACTTTTGTAAATTATTGGGGGTGGGGAGGGGA  
GGGAGGCCTGGGCGGGGCAATAAACCTCCTTTGGGCCGCA

## Oryctolagus cuniculus glyceraldehyde-3-phosphate dehydrogenase (GAPDH), mRNA

NCBI Reference Sequence: NM\_001082253.1

[GenBank Graphics](#)

>NM\_001082253.1 Oryctolagus cuniculus glyceraldehyde-3-phosphate dehydrogenase (GAPDH), mRNA

CGTCCCCTTGTGTGCGCCGTTTCGACAGGCAGCCGCTTCTTCTCGTGCAGTGCTAGCGCGTCCCCGAGA  
CACGATGGTGAAGGTGGAGTGAACGGATTTGGCCGATTGGGCGCCTGGTCACCAGGGCTGCTTTTAAAC  
TCTGGCAAAGTGGATGTTGTGCGCCATCAATGATCCATTGACCTCCACTACATGGTCTACATGTTCC  
AGTATGATTCCACCCACGGCAAGTTCCACGGCACGGTCAAGGCTGAGAACGGGAAGCTGGTCATCAACGG  
GAAGGCCATCACCATCTTCCAGGAGCGAGATCCCGCCAACATCAAGTGGGGTGATGCTGGTGCCGAGTAC  
GTGGTGAATCCACTGGCGTCTTACCACCATGGAGAAGGCCGGGGCTCATTTGAAGGGCGGAGCCAAAA  
GGGTATCATCTCAGCCCCCTCCKCCGATGCCCCATGTTTGTGATGGGCGTGAACCACGAGAAGTATGA  
CAACTCTCTCAAGATTGTGAGCAACGCATCCTGCACCACCAACTGCTTAGCCCCCTGGCCAAGGTCATC  
CACGACCACTTCGGCATTGTGGAGGGGCTCATGACCACGGTGCACGCCATCACTGCCACCCAGAAGACCG  
TGGACGGGCCCCTCTGGGAAGCTGTGGCGTGACGGCCGCGGGGCCCGCCAGAACATCATCCCTGCCTCCAC  
TGGCGCTGCCAAGGCCGTGGGCAAGGTCATCCCCGAGCTGAACGGGAACTCACGGCATGGCCTTCCGT  
GTGCCACCCCCAACGTGTGCGGTGCTGGACCTGACCTGCCGCCTGGAGAAAGCTGCTAAGTATGACGACA  
TCAAGAAGGTGGTGAAGCAGGCATCCGAGGGCCCCCTGAAGGGCATCCTGGGCTACACCGAGGACCAGGT  
CGTCTCCTGCGACTTCAACAGTGCCACCCACTCCTCTACCTTCGATGCTGGGGCTGGCATTGCCCTCAAT  
GACCACTTTGTGAAGCTCATTTCCTGGTATGACAACGAATTTGGCTACAGCAACAGGGTGGTGGACCTCA  
TGGTCCACATGGCCTCCAAGGAGTAAGAGCCCTCAAACCACCGGCCCCAGCGAGAGCACCAGAGGAGGAC  
GAGAGGCCCTCAGCCGCTGGGGAGTCCCTGCCCCACTCAGTCCCACCACGCTGAGAATCTGCCCTCTT  
CACAGTTTCCATCCCAGACCCCCTGGAGGAGGGGAGGGGCTTAGGGAGCCCTACCTTGTGATGAAACCAT  
CAATAAAGTCTCGACAGCAACG
